# Supplementary material
Source: PubMed Central journal article supplement (PMC2868374)
Supplement: NIHMS183251-supplement-supplementary_material.pdf [file NIHMS183251-supplement-supplementary_material.pdf]

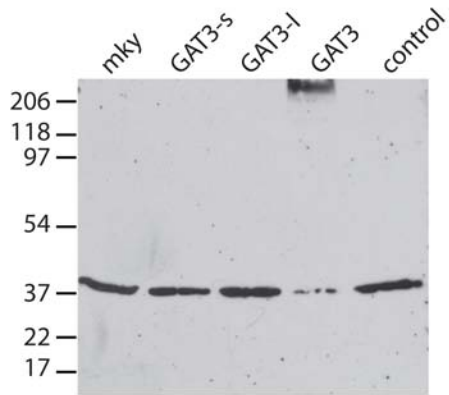

**Supplemental Figure 1. Anti-GAT3 does not recognize denatured monkey GAT3.** Western blots were done on monkey retina (mky), untransfected HEK cells (control), and HEK cells transfected with the short form of GAT3 (GAT3-s), the long form of GAT3 (GAT3-l) and both (GAT3). Same non-specific band is seen in all samples.

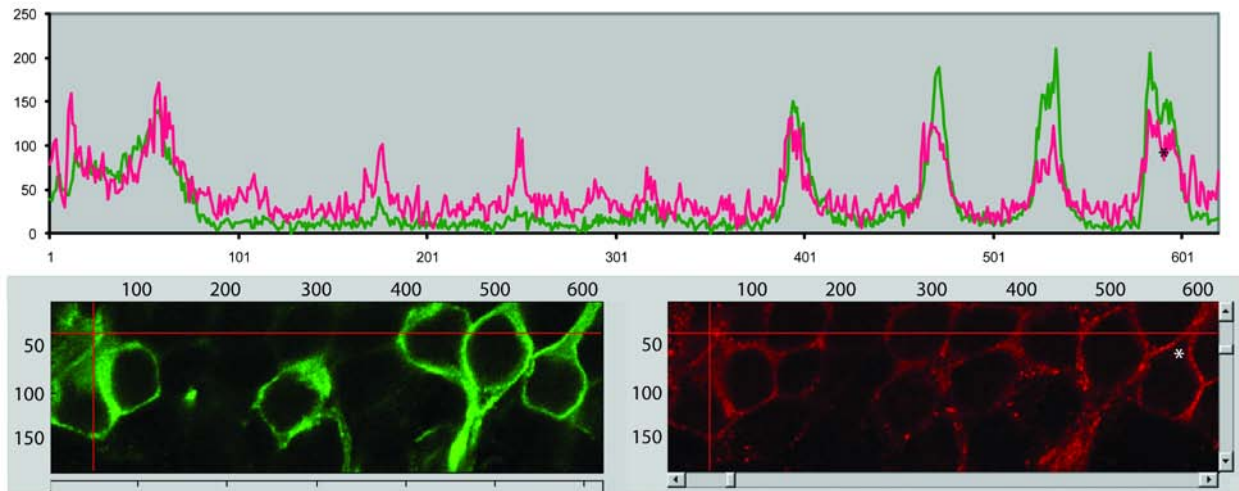

**Supplemental Figure 2. Staining for GAT3 precisely localizes with PKC in rod bipolar cells.** Bottom images show staining for PKC (left, green) and GAT3 (right, red) in the INL. Numbers on the X and Y axes designate pixel numbers. Top: Intensity of green and red stain along the red horizontal lines in the images below. Numbers on the X axis are pixel numbers. The figure shows that the red profiles coincide precisely with the green profiles suggesting the GAT3-stain is localized to the rod bipolar cell, associated with its membrane. Note also the above background intensity within the primary dendrite of the rod bipolar on the right (\*).
